# Supplementary material
Source: PubMed Central journal article supplement (PMC8446986)
Supplement: JGS-69-3051-s001.pdf [file JGS-69-3051-s001.pdf]

1 Supplementary Figure S1. Flow chart of study population selection.

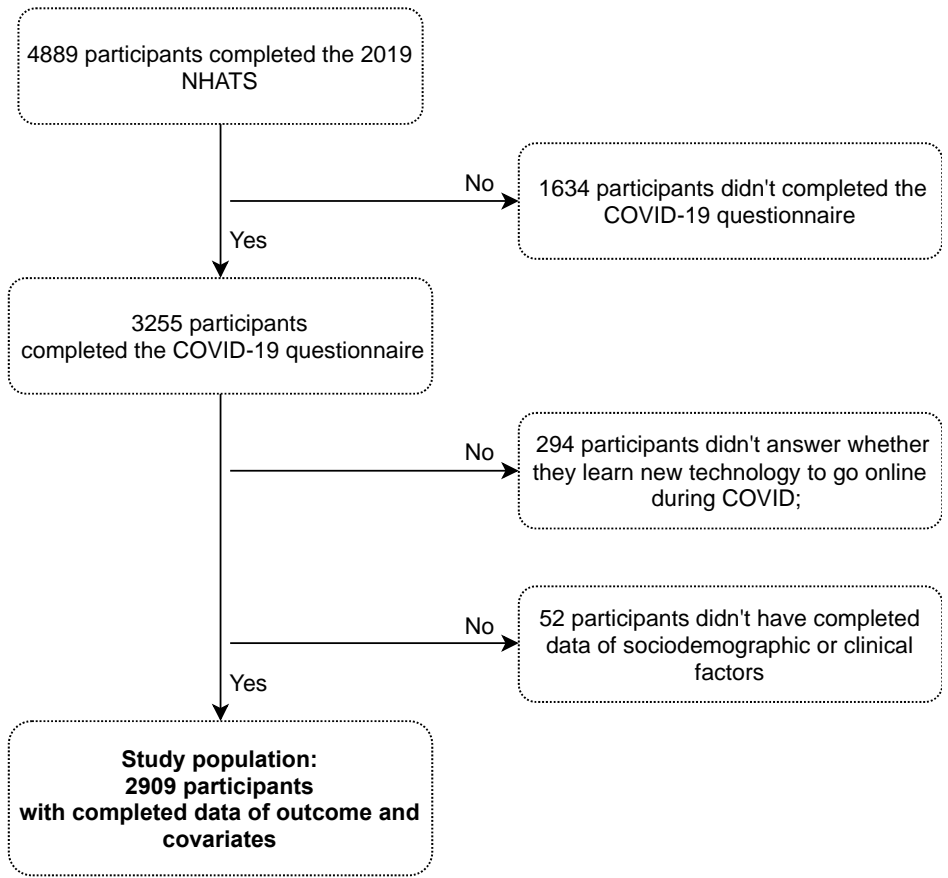

2

3

4 Notes: The selected study population was bold.
